# Supplementary material
Source: Springer Nature journal article supplement (https://www.springermedizin.de/resource/supplementary/12874_2007_287_MOESM2_ESM.pdf/9434166)
Supplement: MOESM2 [file 9434166]

## EPHT

Year

## Other trials

Recruitment starts 1999

WISDOM recruitment starts

2000

Mammogram screening starts

WHI warns 1

2001

WHI warns 2

Recruitment ends

2002

Decision I to shorten exposure

WHI CEE+MPA exposure ends

Application to Wyeth

WISDOM recruitment stops

WISDOM exposure ends

2003

Decision II to shorten exposure

Decision to end exposure

2004

Exposure ends

WHI CEE exposure ends

2005
